# Supplementary material for: Autologous P63+ lung progenitor cell transplantation in idiopathic pulmonary fibrosis: a phase 1 clinical trial
Source: eLife journal article supplement (doi:10.7554/elife.102451), 2024-12-13
Supplement: supp1 [file elife-102451-supp1-v1.pdf]

|                            |                                               |                                |            |
|----------------------------|-----------------------------------------------|--------------------------------|------------|
| <b>Registration Number</b> | CTR20210349                                   | <b>Trial Status</b>            | Completed  |
| <b>Applicant</b>           | Ting Zhang                                    | <b>Initial Disclosure Date</b> | 2021-03-01 |
| <b>Sponsor Name</b>        | Regend Therapeutics XLotus (Jiangxi) Co, Ltd. |                                |            |

## 1. Title and Background Information

|                                          |                                                                                                                                                                                         |
|------------------------------------------|-----------------------------------------------------------------------------------------------------------------------------------------------------------------------------------------|
| <b>Registration Number</b>               | CTR20210349                                                                                                                                                                             |
| <b>Related Registration Number</b>       | NA                                                                                                                                                                                      |
| <b>Drug Name</b>                         | REGEND001 Autologous Therapy Product                                                                                                                                                    |
| <b>Drug Categories</b>                   | Biological products                                                                                                                                                                     |
| <b>Clinical Trial Application Number</b> | Private                                                                                                                                                                                 |
| <b>Indications</b>                       | Early and mid-stage idiopathic pulmonary fibrosis (IPF)                                                                                                                                 |
| <b>Official Title</b>                    | An Open-label Clinical Study to Explore the Safety, Tolerability and Preliminary Efficacy of REGEND001 Autologous Therapy Product for Treatment of Idiopathic Pulmonary Fibrosis (IPF). |
| <b>Common Title</b>                      | Exploratory Study of REGEND001 Autologous Therapy Product for the Treatment of Idiopathic Pulmonary Fibrosis (IPF)                                                                      |
| <b>Protocol Number</b>                   | XHYX-IND-IPF-P1                                                                                                                                                                         |
| <b>Latest Version Number</b>             | V4.0                                                                                                                                                                                    |
| <b>Date of Latest Version</b>            | 2021-05-18                                                                                                                                                                              |
| <b>Combination Therapy</b>               | No                                                                                                                                                                                      |

## 2.Sponsor Information

|                        |                                               |                         |                         |
|------------------------|-----------------------------------------------|-------------------------|-------------------------|
| <b>Sponsor Name</b>    | Regend Therapeutics XLotus (Jiangxi) Co, Ltd. |                         |                         |
| <b>Applicant</b>       | Ting Zhang                                    | <b>Landline Number</b>  | 021-60646685            |
| <b>Mobile Number</b>   | 18516646727                                   | <b>Email Address</b>    | winnie-tzhang@regend.cn |
| <b>Contact Address</b> | Building 8, Nanchang National Pharmaceutical  | <b>Contact Postcode</b> | 330096                  |

|  |                                                                                                                                          |  |  |
|--|------------------------------------------------------------------------------------------------------------------------------------------|--|--|
|  | International Innovation Park Joint Research Institute, 269 Aixi Lake North Road, High-tech Development Zone, Nanchang, Jiangxi Province |  |  |
|--|------------------------------------------------------------------------------------------------------------------------------------------|--|--|

### 3. Clinical Trial Information

|                                                                                                                                                                                                                                                                                                                                                                                                        |                                                                                                                                                                                                                                                                                                                                                                                                                                                                                                             |
|--------------------------------------------------------------------------------------------------------------------------------------------------------------------------------------------------------------------------------------------------------------------------------------------------------------------------------------------------------------------------------------------------------|-------------------------------------------------------------------------------------------------------------------------------------------------------------------------------------------------------------------------------------------------------------------------------------------------------------------------------------------------------------------------------------------------------------------------------------------------------------------------------------------------------------|
| <b>(1). Trial Objective:</b>                                                                                                                                                                                                                                                                                                                                                                           |                                                                                                                                                                                                                                                                                                                                                                                                                                                                                                             |
| Primary Objective:<br>To evaluate the safety and tolerability of different doses of REGEND001 autologous therapy product for the treatment of idiopathic pulmonary fibrosis (IPF).<br>Secondary Objective:<br>To assess the efficacy of different doses of REGEND001 autologous therapy product for the treatment of IPF and recommend appropriate cell therapy doses for subsequent clinical studies. |                                                                                                                                                                                                                                                                                                                                                                                                                                                                                                             |
| <b>(2). Trial design</b>                                                                                                                                                                                                                                                                                                                                                                               |                                                                                                                                                                                                                                                                                                                                                                                                                                                                                                             |
| <b>Trial Classification</b>                                                                                                                                                                                                                                                                                                                                                                            | Safety and efficacy                                                                                                                                                                                                                                                                                                                                                                                                                                                                                         |
| <b>Trial Phase</b>                                                                                                                                                                                                                                                                                                                                                                                     | Exploratory Phase 1 clinical trial                                                                                                                                                                                                                                                                                                                                                                                                                                                                          |
| <b>Design Type</b>                                                                                                                                                                                                                                                                                                                                                                                     | Single-arm trial                                                                                                                                                                                                                                                                                                                                                                                                                                                                                            |
| <b>Randomization</b>                                                                                                                                                                                                                                                                                                                                                                                   | Non-randomized                                                                                                                                                                                                                                                                                                                                                                                                                                                                                              |
| <b>Blinding</b>                                                                                                                                                                                                                                                                                                                                                                                        | Open-label                                                                                                                                                                                                                                                                                                                                                                                                                                                                                                  |
| <b>Trial Scope</b>                                                                                                                                                                                                                                                                                                                                                                                     | Domestic trials                                                                                                                                                                                                                                                                                                                                                                                                                                                                                             |
| <b>(3). Subject Information</b>                                                                                                                                                                                                                                                                                                                                                                        |                                                                                                                                                                                                                                                                                                                                                                                                                                                                                                             |
| <b>Age</b>                                                                                                                                                                                                                                                                                                                                                                                             | 50 to 75 years old (Including ages 50 and 75)                                                                                                                                                                                                                                                                                                                                                                                                                                                               |
| <b>Sexes Eligible for Study</b>                                                                                                                                                                                                                                                                                                                                                                        | Male and Female                                                                                                                                                                                                                                                                                                                                                                                                                                                                                             |
| <b>Accept Healthy Volunteers</b>                                                                                                                                                                                                                                                                                                                                                                       | No                                                                                                                                                                                                                                                                                                                                                                                                                                                                                                          |
| <b>Inclusion Criteria:</b>                                                                                                                                                                                                                                                                                                                                                                             | 1). Male or female, aged between 50 to 75 (Including ages 50 and 75);<br>2). Subjects diagnosed with IPF according to guidelines for the diagnosis of idiopathic pulmonary fibrosis 2018 edition;<br>3). Subjects with 30%~79% of the predicted value in diffusing capacity for carbon monoxide (DLCO) and more than 50% of the predicted value in forced vital capacity (FVC) in pulmonary function tests 3 months before screening;<br>4). Subjects with typical High-resolution computed tomography (HR- |

|                            |                                                                                                                                                                                                                                                                                                                                                   |
|----------------------------|---------------------------------------------------------------------------------------------------------------------------------------------------------------------------------------------------------------------------------------------------------------------------------------------------------------------------------------------------|
|                            | CT) imaging findings of idiopathic pulmonary fibrosis in the past 12 months;                                                                                                                                                                                                                                                                      |
|                            | 5). Subjects tolerant to bronchofiberscope;                                                                                                                                                                                                                                                                                                       |
|                            | 6). Subjects fully informed of the purpose, method and possible discomfort of the trial, agreeing to participate in the test, and voluntarily signing the informed consent;                                                                                                                                                                       |
|                            | 7). Subjects with good adherence, willingness to take medication and regular follow-up examinations as required by the protocol ;                                                                                                                                                                                                                 |
|                            | 8). Subjects able to understand and cooperate with the completion of pulmonary function tests.                                                                                                                                                                                                                                                    |
| <b>Exclusion Criteria:</b> | 1) Subjects who cannot tolerate cell therapy                                                                                                                                                                                                                                                                                                      |
|                            | 2) Pregnant or lactating women;                                                                                                                                                                                                                                                                                                                   |
|                            | 3) Subjects with syphilis or any of human immunodeficiency virus (HIV), hepatitis B virus (HBV), hepatitis C virus (HCV) positive antibody; Of which stable HBV carriers after drug treatment (DNA titer $\leq 500$ IU/mL or copy number $< 1000$ copies/mL) and cured hepatitis C patients (HCV RNA is negative) can be enrolled;                |
|                            | 4) Subjects with malignant tumors or a history of malignant tumors;                                                                                                                                                                                                                                                                               |
|                            | 5) Subjects with taking drugs which caused lung fibroblast such as amiodarone in a long term before screening;                                                                                                                                                                                                                                    |
|                            | 6) Subjects with infections in lung or other site, including bacterial and viral infections, requiring intravenous treatment before cell transplantation;                                                                                                                                                                                         |
|                            | 7) Subjects with a history of invasive or noninvasive mechanical ventilation within 4 weeks;                                                                                                                                                                                                                                                      |
|                            | 8) Subjects with any of the following lung diseases: asthma, active tuberculosis, pulmonary embolism, pneumothorax, pulmonary hypertension, pneumoconiosis, etc.; lung cancer, bronchiolitis obliterans or other active lung disease; Pneumonia currently or within the last 4 weeks; Pneumonectomy Previously;                                   |
|                            | 9) Subjects needing oxygen therapy currently (oxygen therapy time $> 15$ h/d);                                                                                                                                                                                                                                                                    |
|                            | 10) Subjects suffering from serious other systemic diseases, such as myocardial infarction, unstable angina, liver cirrhosis, acute glomerulonephritis, connective tissue disease, etc.;                                                                                                                                                          |
|                            | 11) Subjects with following results: leukopenia (leukopenia $< 4 \times 10^9/L$ ) or agranulocytosis (leukocyte $< 1.5 \times 10^9/L$ or neutrophils $< 0.5 \times 10^9/L$ ) of any cause; Blood creatinine $> 2.5$ times the upper limit of normal; Alanine transaminase (ALT) and Aspartate transaminase (AST) $> 2.5$ times the upper limit of |

|  |                                                                                                                                                                                                                                                     |
|--|-----------------------------------------------------------------------------------------------------------------------------------------------------------------------------------------------------------------------------------------------------|
|  | normal values in the laboratory tests.                                                                                                                                                                                                              |
|  | 12) Subjects with a history of mental illness or suicide risk, epilepsy or other central nervous system disorders                                                                                                                                   |
|  | 13) Subjects with severe arrhythmias (such as ventricular tachycardia, frequent supraventricular tachycardia, atrial fibrillation, atrial flutter, etc.) or atrioventricular block of degree II or above, shown by 12-lead Electrocardiogram (ECG); |
|  | 14). Subjects with a history of abusing alcohol and illicit drug;                                                                                                                                                                                   |
|  | 15). Subjects who are allergic to cattle products;                                                                                                                                                                                                  |
|  | 16). Subjects who participated in other clinical trials in the past 3 months;                                                                                                                                                                       |
|  | 17). Subjects with poor compliance and difficult to complete the investigation;                                                                                                                                                                     |
|  | 18). Investigators, employees of research centers or family members of them (none of whom are suitable to participate in the trial to ensure the objectivity of the research);                                                                      |
|  | 19). Subjects who had an acute exacerbation of IPF or hospitalized for other respiratory diseases 3 or more times in the past 1 year;                                                                                                               |
|  | 20). Subjects who take nintedanib for medication within 1 month, or plan to continue taking nintedanib for medication;                                                                                                                              |
|  | 21). Subjects with other acquired or congenital immunodeficiency disorders, or with a history of organ transplantation or cell transplant therapy;                                                                                                  |
|  | 22). Subjects whose expected survival may be less than one year judged by the investigator;                                                                                                                                                         |
|  | 23). Male participants of childbearing potential and female participants within childbearing age were reluctant to use effective contraception from the time of signing the informed consent to 6 months after cell therapy;                        |
|  | 24). Subjects assessed as inappropriate to participate in this clinical trial by investigator.                                                                                                                                                      |

**(4). Interventions**

| <b>Investigational Drug</b> | <b>Serial Number</b> | <b>Name</b>                                                | <b>Administration</b>                                                                                                                                                   |
|-----------------------------|----------------------|------------------------------------------------------------|-------------------------------------------------------------------------------------------------------------------------------------------------------------------------|
|                             | 1).                  | English Generic Name: REGEND001 Autologous Therapy Product | Dosage Form:<br>Intratracheal administration preparation<br>Specifications: 14mL/bag<br>Administration:<br>Intratracheal administration through fiberoptic bronchoscopy |

|                                               |                      |                                                                                                                              |                                          |                           |
|-----------------------------------------------|----------------------|------------------------------------------------------------------------------------------------------------------------------|------------------------------------------|---------------------------|
|                                               |                      |                                                                                                                              | Administration Frequency:<br>Single dose |                           |
| <b>Control Drug</b>                           | <b>Serial Number</b> | <b>Name</b>                                                                                                                  | <b>Administration</b>                    |                           |
|                                               |                      | NA                                                                                                                           | NA                                       |                           |
| <b>(5). Outcome Measures</b>                  |                      |                                                                                                                              |                                          |                           |
| <b>Primary Outcome and Assessment Time</b>    | <b>Serial Number</b> | <b>Indicators</b>                                                                                                            | <b>Assessment Time</b>                   | <b>Type of indicators</b> |
|                                               | 1)                   | Incidence and severity of the cell therapy-related adverse events (AEs)                                                      | Within 24 weeks after treatment          | Safety Indicator          |
| <b>Secondary Outcomes and Assessment Time</b> | <b>Serial Number</b> | <b>Indicators</b>                                                                                                            | <b>Assessment Time</b>                   | <b>Type of indicators</b> |
|                                               | 1)                   | Incidence of complication related to bronchoscopy;                                                                           | Within 24 weeks after treatment          | Safety Indicator          |
|                                               | 2)                   | Change of tumor markers from baseline                                                                                        | 12 and 24 weeks after treatment          | Safety Indicator          |
|                                               | 3)                   | Change of routine safety assessments (Blood routine, Urine routine, Blood biochemistry, 12-lead Electrocardiogram (ECG))     | Within 24 weeks after treatment          | Safety Indicator          |
|                                               | 4)                   | Change of the percentage of predicted value for single-breath diffusing capacity for carbon monoxide (DLCO-sb) from baseline | 4, 12 and 24 weeks after treatment       | Efficacy Indicator        |
|                                               | 5)                   | Change of forced vital capacity (FVC) from baseline                                                                          | 4, 12 and 24 weeks after treatment       | Efficacy Indicator        |
|                                               | 6)                   | Change of the ratio of diffusing capacity for carbon monoxide/ the alveolar volume                                           | 4, 12 and 24 weeks after treatment       | Efficacy Indicator        |

|                                                 |     |                                                                                  |                                    |                    |
|-------------------------------------------------|-----|----------------------------------------------------------------------------------|------------------------------------|--------------------|
|                                                 |     | (DLCO/VA) from baseline                                                          |                                    |                    |
|                                                 | 7)  | Change of 6-minute-walk test (6MWT) from baseline                                | 4, 12 and 24 weeks after treatment | Efficacy Indicator |
|                                                 | 8)  | Change of St. George's respiratory questionnaire (SGRQ) scale from baseline      | 4, 12 and 24 weeks after treatment | Efficacy Indicator |
|                                                 | 9)  | Change of imaging of lung by high resolution computed tomography (HR-CT)         | 24 weeks after treatment           | Efficacy Indicator |
|                                                 | 10) | Idiopathic pulmonary fibrosis (IPF) exacerbation events (Frequency and severity) | Within 24 weeks after treatment    | Efficacy Indicator |
| <b>(6). Has Data Monitoring Committee (DMC)</b> | No  |                                                                                  |                                    |                    |
| <b>(7). Trial injury insurance for subjects</b> | Yes |                                                                                  |                                    |                    |

#### 4. Investigator Information

|                                                |                         |                               |                          |                                                                          |
|------------------------------------------------|-------------------------|-------------------------------|--------------------------|--------------------------------------------------------------------------|
| <b>(1). Principal Investigator Information</b> |                         |                               |                          |                                                                          |
| <b>Name</b>                                    | Zuojun Xu               |                               | <b>Degree</b>            | Medical Doctor (MD)                                                      |
| <b>Professional Title</b>                      | Senior                  |                               | <b>Phone Number</b>      | 010-69156114                                                             |
| <b>Email</b>                                   | xuzj@hotmail.com        |                               | <b>Postal Address</b>    | No. 1, Shuaifu Garden, Dongcheng District, Beijing, Beijing Municipality |
| <b>Postal Code</b>                             | 100730                  |                               | <b>Institution Name</b>  | Peking Union Medical College Hospital                                    |
| <b>(2). Institution Information</b>            |                         |                               |                          |                                                                          |
| <b>Serial Number</b>                           | <b>Institution Name</b> | <b>Principal Investigator</b> | <b>Country or Region</b> | <b>Province (State) - City</b>                                           |

|    |                                                                     |            |       |                                       |
|----|---------------------------------------------------------------------|------------|-------|---------------------------------------|
| 1) | Peking Union Medical College Hospital                               | Zuojun Xu  | China | Beijing Municipality - Beijing City   |
| 2) | Ruijin Hospital, Shanghai Jiao Tong University School of Medicine I | Jieming Qu | China | Shanghai Municipality - Shanghai City |
| 3) | The First Affiliated Hospital of Guangzhou Medical University       | Qun Luo    | China | Guangdong Province - Guangzhou City   |

## 5. Ethics Committee Information

| Serial Number | Name                                                                                                                                                      | Review Conclusion         | Approval Date/Review Date |
|---------------|-----------------------------------------------------------------------------------------------------------------------------------------------------------|---------------------------|---------------------------|
| 1)            | Ethics Committee for Clinical Trials of Drugs at Peking Union Medical College Hospital Chinese Academy of Medical Sciences                                | Agreed after modification | 2021-01-28                |
| 2)            | Rapid review approval from the Ethics Committee for Clinical Trials of Drugs at Peking Union Medical College Hospital Chinese Academy of Medical Sciences | Agree                     | 2021-06-07                |

## 6. Trial Status

|                                                              |                            |
|--------------------------------------------------------------|----------------------------|
| <b>(1). Trial Status</b>                                     |                            |
| Completed                                                    |                            |
| <b>(2). Participant Enrollment</b>                           |                            |
| <b>Target Enrollment</b>                                     | Domestic: 24 participants; |
| <b>Enrolled Participants</b>                                 | Domestic: 12 participants; |
| <b>Actual Total Enrollment</b>                               | Domestic: 12 participants; |
| <b>(3). Participant Enrollment and Study Completion Date</b> |                            |
| <b>Date of First Subject Signing Informed Consent</b>        | Domestic: 2021-05-14;      |
| <b>Date of First Subject Enrollment</b>                      | Domestic: 2021-07-19;      |
| <b>Study Completion Date</b>                                 | Domestic: 2023-06-09;      |
